# Supplementary material
Source: Hindawi journal article supplement (doi:10.1155/2019/6760205)
Supplement: f1 [file 6760205.f1.pdf]

## **Supplementary materials**

**Suppl Tables 1 – 5: appropriate references in the maintext**

**Suppl Figures 1 – 3: appropriate references in the maintext**

**Suppl Figure 1.** Medina classification change in restenotic cases baseline and at follow-up in BiOSS and DES groups.

**Suppl Figure 2.** Late lumen loss change along the stent in BiOSS and DES groups.

**Suppl Figure 3.** (A) Late lumen loss in LM and non-LM subgroups. (B) Balloon:artery ratio in LM and non-LM subgroups.

**Supplementary Table 1.** BiOSS: Modified Mehran's classification adapted for restenosis in bifurcation lesions.

| Type of restenosis                               | Non-LM<br>N = 19 | LM<br>n = 5 (%) |
|--------------------------------------------------|------------------|-----------------|
| <b>I (focal restenosis, &lt; 10 mm in stent)</b> | <b>12</b>        | <b>2</b>        |
| A (in MV-MB)                                     | 5                | 1               |
| B (in SB)                                        | 4                | 1               |
| C (both)                                         | 3                | 0               |
| <b>II (&gt; 10 mm within the stent)</b>          | <b>4</b>         | <b>1</b>        |
| A (in MV-MB)                                     | 2                | 0               |
| B (in SB)                                        | 0                | 0               |
| C (both)                                         | 2                | 1               |
| <b>III (&gt; 10 mm + outside the stent)</b>      | <b>1</b>         | <b>1</b>        |
| A (in MV-MB)                                     | 0                | 1               |
| B (in SB)                                        | 0                | 0               |
| C (both)                                         | 1                | 0               |
| <b>IV (total occlusion)</b>                      | <b>2</b>         | <b>1</b>        |
| A (in MV)                                        | 0                | 0               |
| B (in MB)                                        | 1                | 0               |
| C (in SB)                                        | 0                | 1               |
| D (in MB and SB)                                 | 1                | 0               |

**Supplementary Table 2.** DES: Modified Mehran's classification adapted for restenosis in bifurcation lesions.

| Type of restenosis                               | LM<br>N = 6 | Non-LM<br>n = 11 |
|--------------------------------------------------|-------------|------------------|
| <b>I (focal restenosis, &lt; 10 mm in stent)</b> | <b>2</b>    | <b>7</b>         |
| A (in MV-MB)                                     | 1           | 2                |
| B (in SB)                                        | 1           | 2                |
| C (both)                                         | 0           | 3                |
| <b>II (&gt; 10 mm within the stent)</b>          | <b>3</b>    | <b>2</b>         |
| A (in MV-MB)                                     | 1           | 0                |
| B (in SB)                                        | 0           | 0                |
| C (both)                                         | 2           | 2                |
| <b>III (&gt; 10 mm + outside the stent)</b>      | <b>1</b>    | <b>1</b>         |
| A (in MV-MB)                                     | 0           | 1                |
| B (in SB)                                        | 0           | 0                |
| C (both)                                         | 1           | 0                |
| <b>IV (total occlusion)</b>                      | <b>0</b>    | <b>1</b>         |
| A (in MV)                                        | 0           | 0                |
| B (in MB)                                        | 0           | 1                |
| C (in SB)                                        | 0           | 0                |
| D (in MB and SB)                                 | 0           | 0                |

**Supplementary Table 3.** Logistic regression for binary restenosis in the whole population.

| Variate                            | Univariate analysis   |         | Multivariate analysis  |         |
|------------------------------------|-----------------------|---------|------------------------|---------|
|                                    | OR (95% CI)           | p-value | OR (95% CI)            | p-value |
| Group: BiOSS vs DES                | 1.380 (0.730 - 2.655) | 0.325   |                        |         |
| Group: BiOSS.Expert vs DES         | 1.504 (0.709 - 3.134) | 0.277   |                        |         |
| Group: BiOSS.LIM vs DES            | 1.238 (0.531 - 2.739) | 0.606   |                        |         |
| Sex: female vs male                | 0.568 (0.239 - 1.206) | 0.166   |                        |         |
| Age [increase per 1 year]          | 0.990 (0.957 - 1.024) | 0.547   | 0.959 (0.922 - 0.996)  | 0.029   |
| NSTEMI/UA                          | 2.243 (1.054 - 4.525) | 0.029   |                        |         |
| arterial hypertension              | 1.377 (0.625 - 3.476) | 0.459   |                        |         |
| diabetes                           | 1.335 (0.687 - 2.540) | 0.383   |                        |         |
| diabetes on insulin                | 2.824 (1.136 - 6.384) | 0.017   | 4.213 (1.483 - 11.444) | 0.005   |
| Dyslipidemia                       | 1.253 (0.627 - 2.681) | 0.540   |                        |         |
| prior myocardial infarction        | 1.259 (0.661 - 2.384) | 0.479   |                        |         |
| prior PCI                          | 0.861 (0.453 - 1.629) | 0.644   |                        |         |
| prior coronary artery bypass graft | 2.039 (1.785 - 4.686) | 0.043   | 2.771 (0.991 - 7.100)  | 0.040   |
| chronic kidney disease             | 1.011 (0.292 - 2.691) | 0.984   |                        |         |
| smoking                            | 1.027 (0.464 - 2.098) | 0.944   |                        |         |
| Ture Bifurcation                   | 2.280 (0.883 - 7.772) | 0.127   |                        |         |
| left main bifurcation              | 1.032 (0.515 - 2.213) | 0.932   |                        |         |
| main vessel predilatation          | 2.720 (1.248 - 6.822) | 0.019   | 2.643 (1.175 - 6.784)  | 0.028   |
| side branch predilatation          | 1.250 (0.629 - 2.403) | 0.511   |                        |         |
| side branch stenting               | 1.180 (0.339 - 3.171) | 0.766   |                        |         |
| final kissing balloon              | 0.627 (0.307 - 1.218) | 0.181   |                        |         |
| proximal optimization technique    | 0.181 (0.076 - 0.381) | <0.001  | 0.150 (0.061 - 0.327)  | <0.001  |
| Implantation pressure > 12 atm     | 1.235 (0.765 - 2.321) | 0.589   |                        |         |
| BA/RD ratio                        | 1.324 (0.897 - 1.788) | 0.856   |                        |         |
| ALG in MV                          | 0.566 (0.312 - 1.499) | 0.331   |                        |         |
| ALG in MB                          | 0.761 (0.440 - 2.122) | 0.518   |                        |         |
| ALG in SB                          | 0.898 (0.650 - 1.231) | 0.632   |                        |         |
| LM ostium coverage                 | 1.070 (0.381 - 2.447) | 0.821   |                        |         |
| MV predilatation if %DS $\geq$ 70% | 2.120 (1.478 - 5.214) | 0.003   | 2.221 (1.369 - 5.897)  | 0.031   |

PCI – percutaneous coronary intervention, UA/NSTEMI – unstable angina/non-ST-elevation myocardial infarction.

**Supplementary Table 4.** Logistic regression for binary restenosis in the LM population.

| Variate                            | Univariate analysis   |         | Multivariate analysis |         |
|------------------------------------|-----------------------|---------|-----------------------|---------|
|                                    | OR (95% CI)           | p-value | OR (95% CI)           | p-value |
| Group: BiOSS vs DES                | 1.110 (0.760 - 1.445) | 0.234   |                       |         |
| Group: BiOSS.Expert vs DES         | 1.326 (0.891 - 2.341) | 0.277   |                       |         |
| Group: BiOSS.LIM vs DES            | 1.131 (0.791 - 1.872) | 0.606   |                       |         |
| Sex: female vs male                | 0.744 (0.349 - 1.123) | 0.166   |                       |         |
| Age [increase per 1 year]          | 1.320 (0.788 - 1.454) | 0.547   |                       |         |
| NSTEMI/UA                          | 1.543 (0.875 - 2.545) | 0.029   |                       |         |
| arterial hypertension              | 1.231 (0.532 - 2.111) | 0.459   |                       |         |
| diabetes                           | 1.563 (0.322 - 4.170) | 0.383   |                       |         |
| diabetes on insulin                | 2.110 (0.846 - 7.214) | 0.017   |                       |         |
| Dyslipidemia                       | 1.111 (0.722 - 1.381) | 0.540   |                       |         |
| prior myocardial infarction        | 1.542 (0.769 - 1.733) | 0.479   |                       |         |
| prior PCI                          | 1.121 (0.633 - 1.522) | 0.644   |                       |         |
| prior coronary artery bypass graft | 1.349 (0.435 - 2.136) | 0.113   |                       |         |
| chronic kidney disease             | 1.511 (0.642 - 2.111) | 0.984   |                       |         |
| smoking                            | 1.111 (0.322 - 1.908) | 0.944   |                       |         |
| Ture Bifurcation                   | 2.122 (0.783 - 9.111) | 0.127   |                       |         |
| main vessel predilatation          | 2.321 (1.548 - 4.231) | 0.019   | 2.743 (1.321 - 5.432) | 0.028   |
| side branch predilatation          | 1.210 (0.459 - 2.127) | 0.511   |                       |         |
| side branch stenting               | 1.590 (0.874 - 4.234) | 0.766   |                       |         |
| final kissing balloon              | 0.875 (0.643 - 0.933) | 0.040   | 0.734 (0.548 - 0.903) | 0.004   |
| proximal optimization technique    | 0.341 (0.105 - 0.492) | <0.001  | 0.234 (0.109 - 0.392) | <0.001  |
| Implantation pressure > 12 atm     | 1.235 (0.765 - 2.321) | 0.589   |                       |         |
| BA/RD ratio                        | 1.345 (0.902 - 1.448) | 0.856   |                       |         |
| LM ostium coverage                 | 1.170 (0.441 - 1.467) | 0.821   |                       |         |
| MV predilatation if %DS $\geq$ 70% | 1.895 (1.235 - 2.764) | 0.002   | 2.011 (1.577 - 3.129) | <0.001  |

PCI – percutaneous coronary intervention, UA/NSTEMI – unstable angina/non-ST-elevation myocardial infarction.

**Supplementary Table 5.** Logistic regression for binary restenosis in the non-LM population.

| Variate                            | Univariate analysis   |         | Multivariate analysis |         |
|------------------------------------|-----------------------|---------|-----------------------|---------|
|                                    | OR (95% CI)           | p-value | OR (95% CI)           | p-value |
| Group: BiOSS vs DES                | 1.481 (0.521 - 1.955) | 0.325   |                       |         |
| Group: BiOSS.Expert vs DES         | 1.604 (0.939 - 3.344) | 0.277   |                       |         |
| Group: BiOSS.LIM vs DES            | 1.428 (0.641 - 2.219) | 0.606   |                       |         |
| Sex: female vs male                | 0.782 (0.459 - 1.561) | 0.166   |                       |         |
| Age [increase per 1 year]          | 1.090 (0.911 - 1.132) | 0.547   |                       |         |
| NSTEMI/UA                          | 2.010 (0.934 - 3.125) | 0.209   |                       |         |
| arterial hypertension              | 1.377 (0.625 - 3.476) | 0.459   |                       |         |
| diabetes                           | 1.335 (0.687 - 2.540) | 0.383   |                       |         |
| diabetes on insulin                | 1.832 (1.236 - 4.121) | 0.003   | 2.111 (1.328 - 7.135) | 0.028   |
| Dyslipidemia                       | 1.245 (0.721 - 1.671) | 0.540   |                       |         |
| prior myocardial infarction        | 1.112 (0.431 - 2.103) | 0.479   |                       |         |
| prior PCI                          | 0.922 (0.763 - 1.109) | 0.644   |                       |         |
| prior coronary artery bypass graft | 3.652 (1.112 - 4.686) | 0.053   | 2.921 (1.052 - 4.221) | 0.030   |
| chronic kidney disease             | 1.212 (0.312 - 2.721) | 0.984   |                       |         |
| smoking                            | 1.111 (0.644 - 1.973) | 0.944   |                       |         |
| Ture Bifurcation                   | 1.891 (0.723 - 6.345) | 0.127   |                       |         |
| main vessel predilatation          | 2.120 (1.568 - 5.441) | 0.020   | 2.831 (1.455 - 6.111) | 0.021   |
| side branch predilatation          | 1.010 (0.282 - 1.813) | 0.511   |                       |         |
| side branch stenting               | 1.231 (0.439 - 2.211) | 0.766   |                       |         |
| final kissing balloon              | 0.711 (0.417 - 1.338) | 0.181   |                       |         |
| proximal optimization technique    | 0.231 (0.091 - 0.342) | <0.001  | 0.183 (0.073 - 0.427) | <0.001  |
| Implantation pressure > 12 atm     | 1.341 (0.821 - 1.901) | 0.589   |                       |         |
| BA/RD ratio                        | 1.114 (0.492 - 1.448) | 0.856   |                       |         |
| MV predilatation if %DS $\geq$ 70% | 1.821 (1.279 - 3.431) | 0.002   | 2.001 (1.477 - 4.011) | 0.025   |

PCI – percutaneous coronary intervention, UA/NSTEMI – unstable angina/non-ST-elevation myocardial

infarction.

Suppl Figure  
1

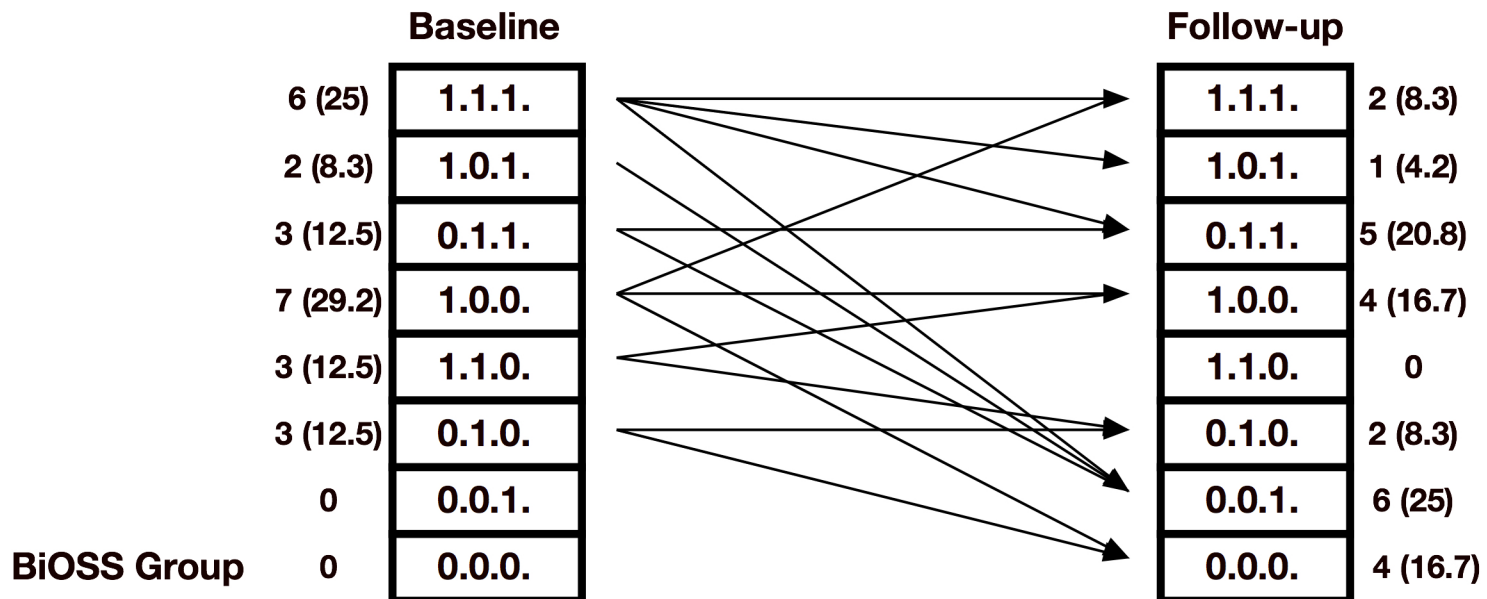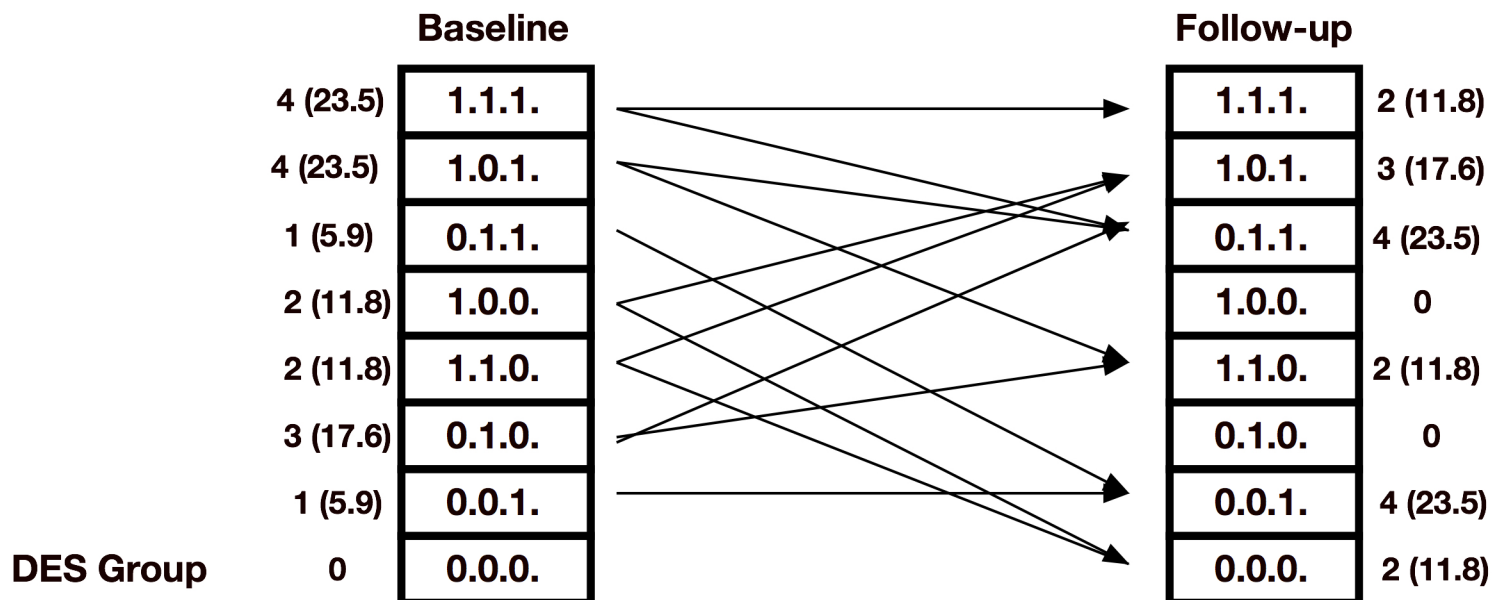

Suppl Figure  
2

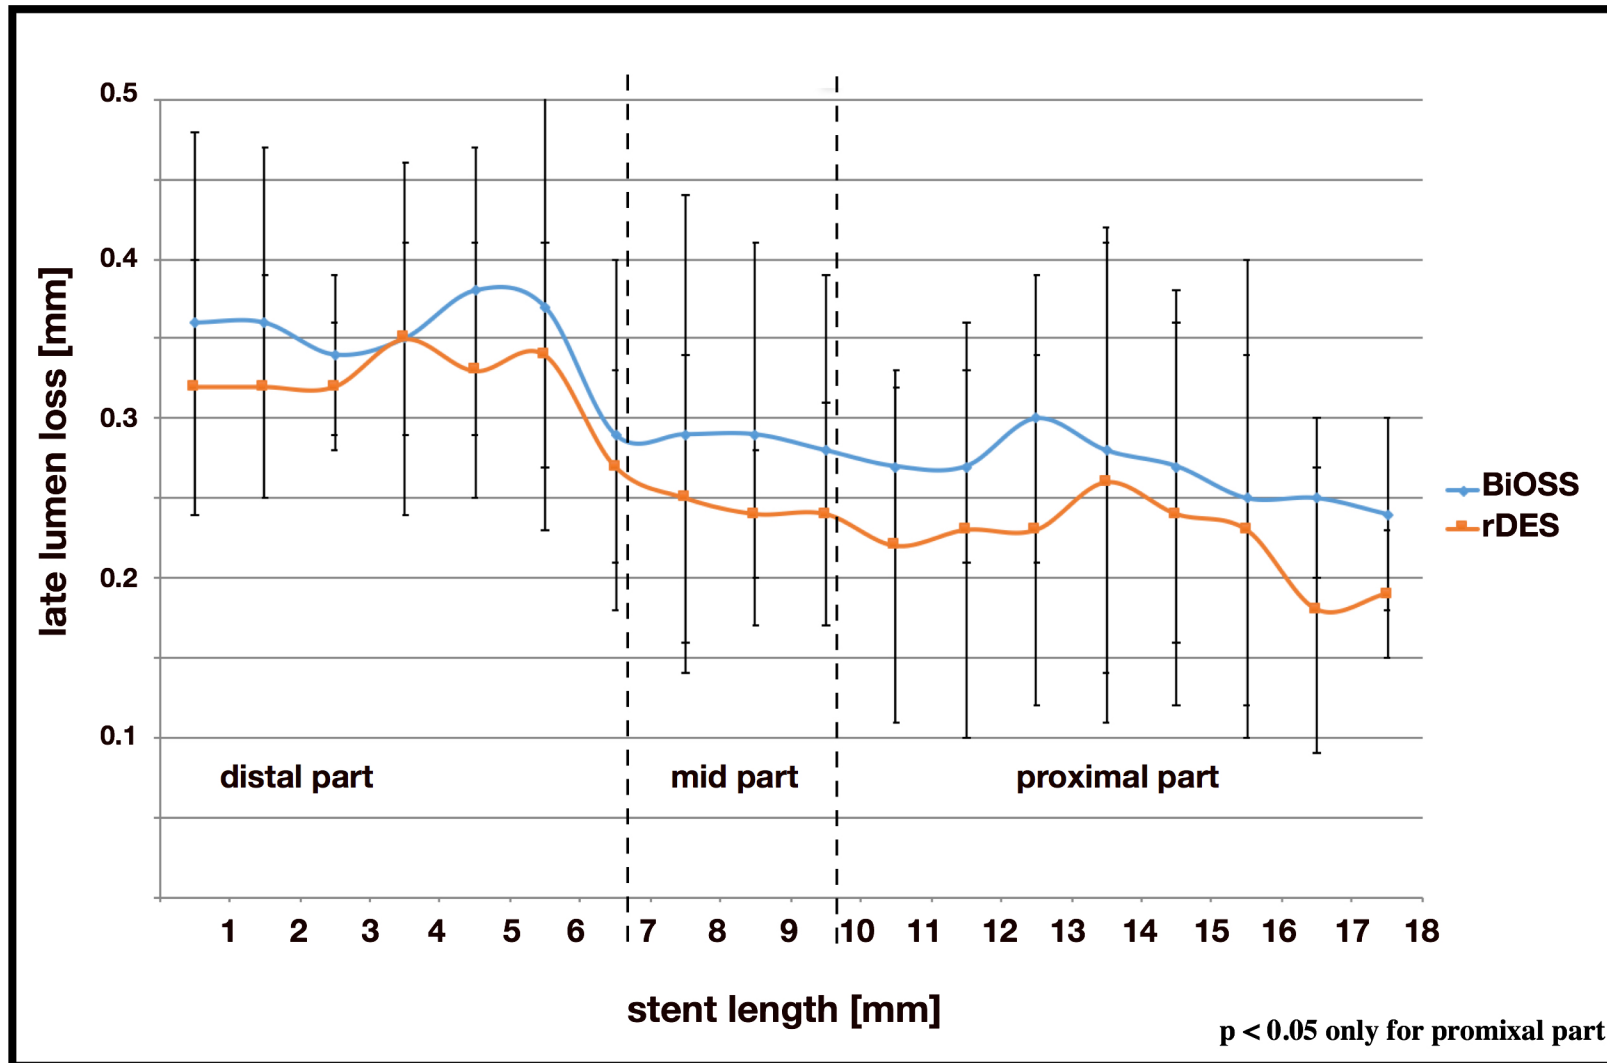



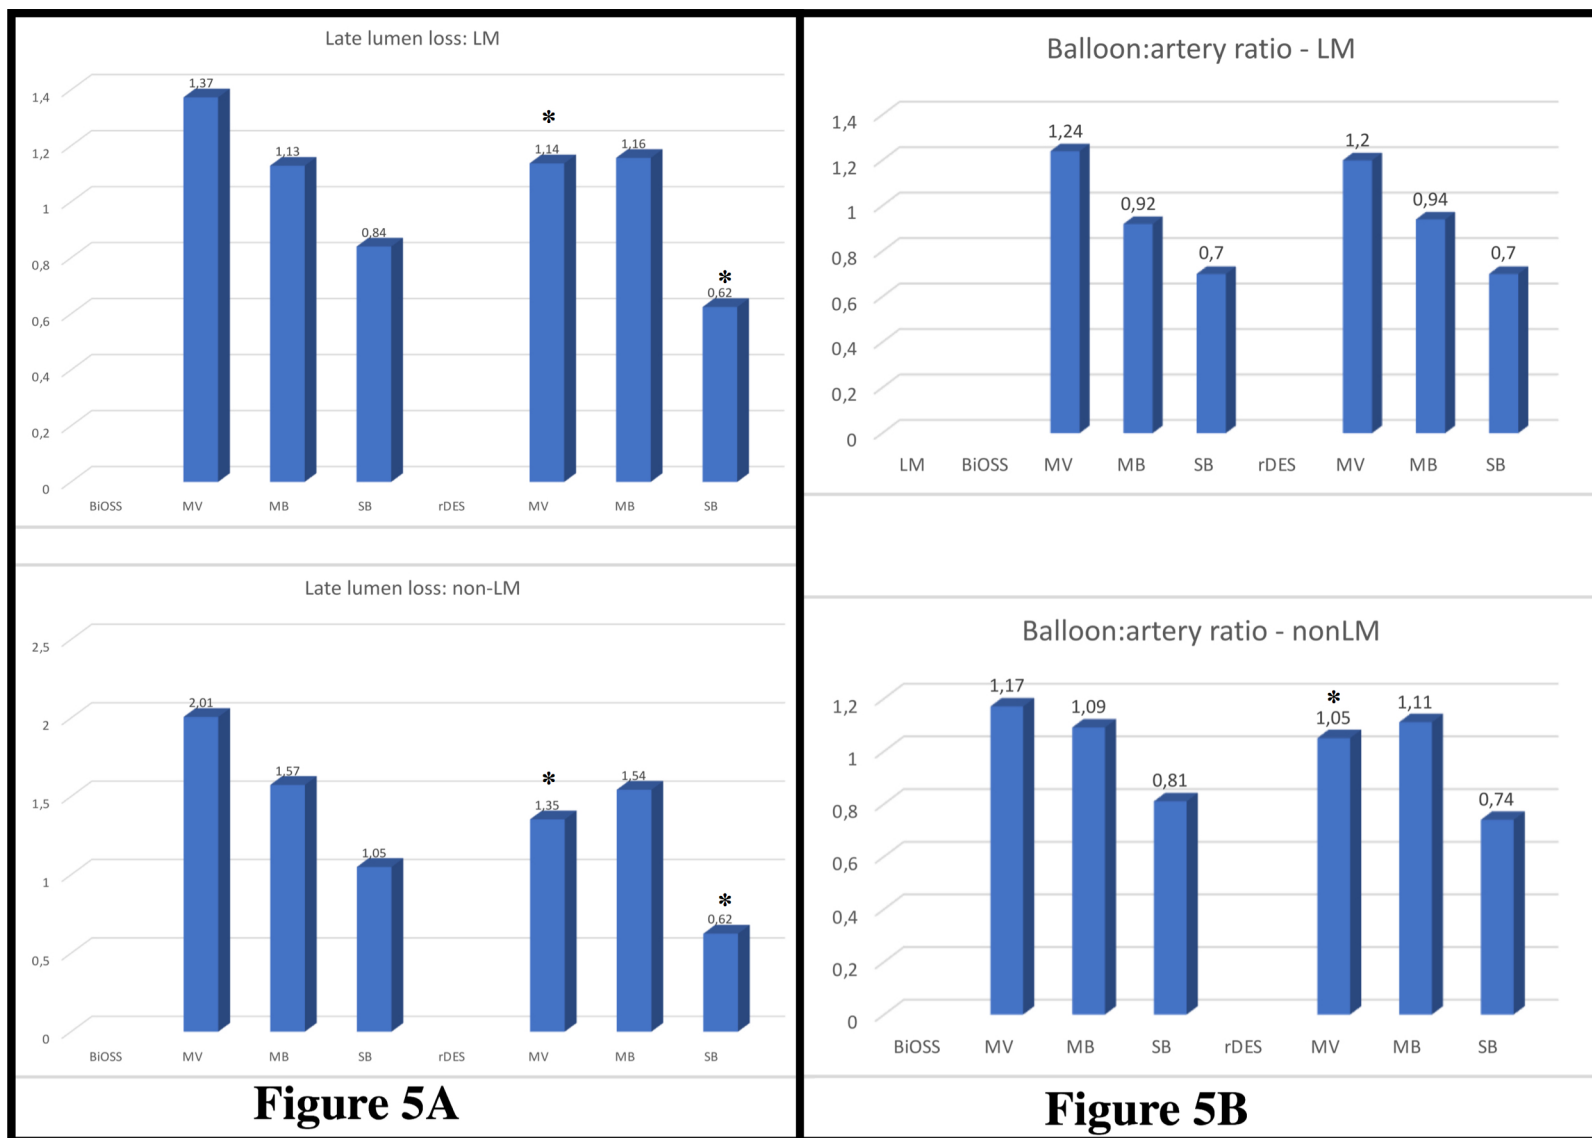

\*p < 0.05 for BiOSS vs DES
